# Supplementary material
Source: PubMed Central journal article supplement (PMC3471781)
Supplement: NIHMS412118-supplement-01.pdf [file NIHMS412118-supplement-01.pdf]

**Table S1. Listing of Proteins Identified in CMT3 Purifications Filtered at 1% of CMT3, Related to Figure 1 and Table 1**

Proteins present in both CMT3 and wild-type samples were filtered at 10% of CMT3 after subtraction of the protein amounts present in WT. <sup>1</sup>Unique peptides map to the group of these genes.

| Protein          | AGI Code                                                                                            | Spectra | Unique Peptides | %Coverage | NSAF <sub>5</sub> | % CMT3 |
|------------------|-----------------------------------------------------------------------------------------------------|---------|-----------------|-----------|-------------------|--------|
| CMT3             | At1g69770                                                                                           | 756     | 131             | 63.4      | 7240              | 100    |
| H1               | At1g06760                                                                                           | 19      | 11              | 31.8      | 557               | 7.7    |
| H1               | At3g18035                                                                                           | 29      | 17              | 22.3      | 485               | 6.7    |
| H1/H5            | At1g48620                                                                                           | 28      | 12              | 17.3      | 470               | 6.5    |
| H1.2             | At2g30620                                                                                           | 46      | 16              | 47.3      | 1353              | 18.7   |
| HTA13            | At3g20670                                                                                           | 50      | 7               | 21.2      | 3043              | 42.0   |
| HTA6             | At5g59870                                                                                           | 18      | 4               | 17.3      | 964               | 13.3   |
| HTA9             | At1g52740                                                                                           | 15      | 4               | 30.6      | 899               | 12.4   |
| HTA7             | At5g27670                                                                                           | 15      | 3               | 8.0       | 803               | 11.1   |
| HTA12            | At5g02560                                                                                           | 5       | 2               | 7.8       | 262               | 3.6    |
| HTA8             | At2g38810                                                                                           | 15      | 4               | 32.4      | 251               | 3.5    |
| H2B <sup>1</sup> | At5g02570<br>At3g09480                                                                              | 59      | 13              | 32.6      | 3675              | 50.8   |
| H2B              | At2g37470                                                                                           | 62      | 15              | 46.4      | 3610              | 49.9   |
| H2B              | At3g53650                                                                                           | 32      | 8               | 30.4      | 1863              | 25.7   |
| H2B <sup>1</sup> | At5g59910<br>At1g07790<br>At5g22880<br>At3g45980<br>At3g46030                                       | 79.6    | 16.6            | 42.2      | 4327              | 59.8   |
| H3 <sup>1</sup>  | At5g10400<br>At1g09200<br>At5g10390<br>At5g65360<br>At3g27360                                       | 63      | 21              | 52.9      | 3674              | 50.7   |
| HTR12            | At1g01370                                                                                           | 2       | 2               | 25.3      | 90.3              | 1.2    |
| H4 <sup>1</sup>  | At1g07820<br>At3g3730<br>At2g28740<br>At5g59970<br>At3g46320<br>At3g45930<br>At5g59690<br>At1g07660 | 26      | 13              | 62.1      | 2028              | 28.0   |
| Ku80             | At1g48050                                                                                           | 24      | 19              | 33.8      | 284               | 3.9    |
| Ku70             | At1g16970                                                                                           | 10      | 8               | 16.7      | 129               | 1.8    |

|                    |           |     |    |      |      |      |
|--------------------|-----------|-----|----|------|------|------|
|                    | At5g25980 | 204 | 50 | 62   | 3205 | 44.3 |
|                    | At5g62390 | 67  | 34 | 43.7 | 1207 | 16.7 |
|                    | At4g25210 | 51  | 26 | 36.4 | 1114 | 15.4 |
| RPL32              | AtCg01020 | 3   | 2  | 30.8 | 463  | 6.4  |
| 60S <sup>1</sup>   | At1g15250 | 4   | 2  | 17.9 | 338  | 4.7  |
|                    | At1g52300 |     |    |      |      |      |
|                    | At3g16080 |     |    |      |      |      |
| 60S <sup>1</sup>   | At2g25210 | 2   | 2  | 25.4 | 338  | 4.7  |
|                    | At4g31985 |     |    |      |      |      |
| RPS18 <sup>1</sup> | AtCg00650 | 4   | 2  | 20.8 | 318  | 4.4  |
|                    | At2g27402 | 2   | 2  | 32.7 | 309  | 4.3  |
| 40S <sup>1</sup>   | At3g53890 | 2   | 2  | 19.2 | 192  | 2.7  |
|                    | At5g27700 |     |    |      |      |      |
| RPS15              | AtCg01120 | 2   | 2  | 25   | 183  | 2.5  |
| 40S <sup>1</sup>   | At5g02960 | 3   | 3  | 21.1 | 170  | 2.3  |
|                    | At3g09680 |     |    |      |      |      |
|                    | At4g29410 | 3   | 3  | 15.4 | 169  | 2.3  |
| CIP4               | At5g37190 | 18  | 2  | 3.2  | 165  | 2.3  |
|                    | At1g02813 | 3   | 2  | 16.1 | 162  | 2.2  |
|                    | At2g38270 | 6   | 4  | 10.7 | 161  | 2.2  |
|                    | At2g38270 | 5   | 2  | 6.5  | 137  | 1.9  |
|                    | At2g19740 | 2   | 2  | 16.8 | 135  | 1.9  |
|                    | At5g56710 |     |    |      |      |      |
|                    | At5g1590  | 7   | 5  | 19.8 | 134  | 1.9  |
|                    | At1g31310 | 6   | 4  | 14.6 | 126  | 1.7  |
|                    | At3g12390 | 3   | 2  | 13.8 | 119  | 1.6  |
|                    | At2g32650 | 2   | 2  | 14.4 | 116  | 1.6  |
|                    | At2g32180 |     |    |      |      |      |
|                    | At5g06910 | 4   | 4  | 21.8 | 113  | 1.6  |
|                    | At5g67510 | 2   | 2  | 14.4 | 110  | 1.5  |
|                    | At3g54090 | 6   | 5  | 20.0 | 102  | 1.4  |
|                    | At4g20130 | 6   | 5  | 15.7 | 100  | 1.4  |
|                    | Atcg00190 | 13  | 8  | 11.5 | 97   | 1.3  |
|                    | At3g07050 | 7   | 2  | 4.5  | 96   | 1.3  |
|                    | At5g40950 | 2   | 2  | 14.1 | 81   | 1.1  |
|                    | At1g69200 | 6   | 6  | 11.7 | 78   | 1.1  |
|                    | At5g42960 | 2   | 2  | 6.6  | 75   | 1.0  |

**Table S2. Summary of Proteins Associated with CMT3 after Benzonase Treatment (Top) and Partial Proteins Associated with Chromo Mutant CMT3chr3 (Bottom) Identified by Mass Spectrometric Analyses, Related to Figures 1 and 6**

The percentage of CMT3 (% CMT3) column indicates the approximate stoichiometry of each co-purifying protein as a function of the Normalized Spectral Abundance Factor (NSAF). Listing of proteins were filtered at 1% of CMT3.

CMT3 Purification after Benzonase Treatment

| Name | AGI Code  | Spectra | Unique Peptides | %Coverage | NSAF <sub>5</sub> | %CMT3 |
|------|-----------|---------|-----------------|-----------|-------------------|-------|
| CMT3 | At1g69770 | 508     | 57              | 39.5      | 3957              | 100   |
| H1.2 | At2g30620 | 4       | 3               | 16.1      | 95                | 2.4   |

CMT3chr3 Purification

| Name | AGI Code  | Spectra | Unique Peptides | %Coverage | NSAF <sub>5</sub> | %CMT3 |
|------|-----------|---------|-----------------|-----------|-------------------|-------|
| CMT3 | At1g69770 | 277     | 54              | 41.8      | 1472              | 100   |

**Table S3. List of Primers Used for Cloning CMT3, Bisulfite Sequencing, and Methyltransferase Activity Assay, Related to Figure 3**

|                                          | Primer numbers   | Primer sequences from 5' to 3'                                                                         |
|------------------------------------------|------------------|--------------------------------------------------------------------------------------------------------|
| Full length genomic cloning into pENTR/D | JP5048<br>JP5049 | CACCATGCATACATATAGCTTCACAAATACCCG<br>TGCAAGCTCGGAAGGAAGAGTTGGCTTCATGAATGC                              |
| Point mutation C460A                     | JP4026<br>JP4027 | GTGGGCCACCAGCCCAAGGAATCAGTGGTC<br>GACCACTGATTCTTGGGCTGGTGGCCAC                                         |
| Point mutation F382A                     | JP2061<br>JP2062 | GATGATGGAGAAGTTGCGACTGTTGACAAGATTGTTG<br>CAACAATCTTGTCAACAGTCGCAACTTCTCCATCATC                         |
| Point mutation W409L                     | JP2073<br>JP2074 | CTTTATTTGAAGGTAAGGCTGCTGAATTATGATGATTCTCAT<br>GAT<br>ATCATGAGAATCATCATAATTCAGCAGCCTTACCTTCAAATA<br>AAG |
| Point mutation Y412A                     | JP2069<br>JP2070 | GGTAAGGTGGCTGAATGCGGATGATTCTCATG<br>CATGAGAATCATCCGCATTCAGCCACCTTACC                                   |
| Full length cDNA cloning into pVIC       | JP3946<br>JP4286 | CCGGGGTACCGAATTCTGCAAGCTCGGAAGGAAGA<br>CCGGCTCGAGGAATTCTGCAAGCTCGGAAGGAAGA                             |
| Full length cDNA cloning to pET-SUMO     | JP6093<br>JP6094 | ATGGCGCCGAAGCGAAAGAGACC<br>ACAGTGTTTCATGCAAGCTCGGAAG                                                   |
| <i>Ta3</i> bisulfite sequencing          | JP1274<br>JP1269 | CCACTRATTCCTRAAACACAACATTTCTRCTRATA<br>GAGAATYAGGTTAATAAGAAAGTGAAGTGTT                                 |
| <i>Ta3</i> hairpin bisulfite sequencing  | JP3200<br>JP1615 | AATCCAATTCCRATTTAATATTTTTCTAATAATATTCRATTTAA<br>CGGTTTAATGTTGGTTTAGTGATATTYGGTTTAGT                    |
| unmethylated oligo                       | JP3010<br>JP3011 | AACGCAGCATGCGCTGCTAGCGCAGCTAGCGCTGCATG<br>AACATGCAGCGCTAGCTGCGCTAGCAGCGCATGCTGCG                       |
| hemimethylated oligo                     | JP3010<br>JP3018 | AACGCAGCATGCGCTGCTAGCGCAGCTAGCGCTGCATG<br>AAMGMAGMATGMGMTGMTAGMGMAGMTAGMGMATG                          |
| Fully-methylated oligo                   | JP3018<br>JP3019 | AAMGMAGMATGMGMTGMTAGMGMAGMTAGMGMATG<br>AAMATGMAGMGMATGMTGMGMTAGMAGMGMATGMTGMG                          |
| CHG methylated oligo                     | JP3014<br>JP3015 | AACGMAGCATGCGMTGCTAGCGMAGCTAGCGMTGCATG<br>AACATGMAGCGCTAGMTGCGCTAGMAGCGCATGMTGCG                       |

**Table S4. Summary of Arabidopsis Histone H3 Proteins Copurified with CMT3, Related to Figure 3**

CMT3 specifically pulls down centromeric histone and histone H3.1, but not H3.3. <sup>1</sup>Unique peptides map to the group of these genes.

| AGI Code  | H3 type   | # of unique peptides associated with CMT3 |
|-----------|-----------|-------------------------------------------|
| At1g01370 | HTR12     | 2                                         |
| At1g09200 | H3.1      |                                           |
| At3g27360 | H3.1      |                                           |
| At5g10390 | H3.1      | 21 <sup>1</sup>                           |
| At5g10400 | H3.1      |                                           |
| At5g65360 | H3.1      |                                           |
| At5g65350 | H3.1-like | 0                                         |
| At4g40030 | H3.3      |                                           |
| At4g40040 | H3.3      |                                           |
| At5g10980 | H3.3      |                                           |
| At1g13370 | H3.3-like | 0 <sup>1</sup>                            |
| At1g19890 | H3.3-like |                                           |
| At1g75600 | H3.3-like |                                           |
| At1g75610 | H3.3-like |                                           |
| At5g12910 | H3.3-like |                                           |

**Table S5. Summary of X-Ray Diffraction Data and Structure Refinement Statistics,  
Related to Figures 4 and 5**

**Summary of Diffraction Data**

| Crystal                         | Se-ZMET2 + SAH                    | ZMET2 + SAH +<br>H3(1-15)K9me2 | ZMET2 + SAH +<br>H3(1-32)K9me2 |
|---------------------------------|-----------------------------------|--------------------------------|--------------------------------|
| Beamline                        | APS-24ID-E                        | APS-24ID-E                     | APS-24ID-E                     |
| PDB code                        | 4FSX                              | 4FT2                           | 4FT4                           |
| Wavelength (Å)                  | 0.9792                            | 0.9792                         | 0.9792                         |
| Space group                     | <i>P</i> 1                        | <i>P</i> 1                     | <i>P</i> 2 <sub>1</sub>        |
| Cell parameters                 |                                   |                                |                                |
| <i>a</i> (Å)                    | 64.9                              | 64.9                           | 64.6                           |
| <i>b</i> (Å)                    | 89.0                              | 88.7                           | 111.6                          |
| <i>c</i> (Å)                    | 113.5                             | 113.4                          | 151.5                          |
| α (°)                           | 93.5                              | 93.2                           | 90                             |
| β (°)                           | 95.5                              | 95.7                           | 102.0                          |
| γ (°)                           | 110.4                             | 110.7                          | 90                             |
| Resolution (Å)                  | 50.0-3.2 (3.31-3.20) <sup>a</sup> | 50.0-3.2 (3.31-3.20)           | 50.0-2.7 (2.80-2.70)           |
| <i>R</i> <sub>merge</sub> (%)   | 17.5 (59.5)                       | 11.8 (50.3)                    | 8.8 (50.7)                     |
| Observed reflections            | 143,259                           | 133,229                        | 210,454                        |
| Unique reflections              | 38,702                            | 38,805                         | 57,221                         |
| Redundancy                      | 3.7 (3.6)                         | 3.4 (3.4)                      | 3.7 (3.7)                      |
| Average <i>I</i> /σ( <i>I</i> ) | 7.2 (1.6)                         | 12.6 (2.2)                     | 21.2 (2.4)                     |
| Completeness (%)                | 99.2 (98.8)                       | 99.0 (98.8)                    | 98.6 (98.4)                    |

**Refinement and Structure Model**

|                                            |             |             |              |
|--------------------------------------------|-------------|-------------|--------------|
| <i>R</i> factor / Free <i>R</i> factor (%) | 24.0 / 26.3 | 23.5 / 27.7 | 20.6 / 24.8  |
| Number of non-H atoms                      | 10,631      | 10,657      | 11,265       |
| Protein / Peptide                          | 10,579 / -  | 10,549 / 56 | 10,957 / 96  |
| Ligand                                     | 52          | 52          | 52           |
| Water                                      | -           | -           | 160          |
| Average B factor (Å <sup>2</sup> )         | 70.7        | 76.2        | 73.6         |
| Protein / Peptide                          | 70.8 / -    | 76.2 / 92.3 | 73.6 / 122.5 |
| Ligand                                     | 57.3        | 61.5        | 50.7         |
| Water                                      | -           | -           | 49.7         |
| RMS deviations                             |             |             |              |
| Bond lengths (Å)                           | 0.013       | 0.009       | 0.009        |
| Bond angles (°)                            | 1.819       | 1.575       | 1.275        |

<sup>a</sup>Values in parentheses are for highest-resolution shell.
